# Supplementary material for: An ato-topology metal–organic framework with large C2H2 adsorption and C2H2/CO2 separation capacity
Source: Royal Society of Chemistry journal article supplement (doi:10.1039/d2dt02968e), 2022-01-01
Supplement: d2dt02968e1.pdf [file d2dt02968e1.pdf]

Supplementary Information

**An ato-Topology Metal-Organic Framework with Large C<sub>2</sub>H<sub>2</sub>  
Adsorption and C<sub>2</sub>H<sub>2</sub>/CO<sub>2</sub> Separation Capacity**

Ting Wang,<sup>‡a</sup> Zhi-Jie Jiang,<sup>‡a</sup> Ying Wang,<sup>a</sup> Rong-Jia Wei,<sup>a</sup> Heng Zeng,<sup>\*a</sup> Weigang Lu,<sup>\*a</sup> and Dan Li<sup>a</sup>

<sup>a</sup>College of Chemistry and Materials Science, Guangdong Provincial Key Laboratory of Functional Supramolecular Coordination Materials and Applications, Jinan University, Guangzhou 510632, P. R. China.

E-mail: zengheng90@163.com; weiganglu@jnu.edu.cn.

<sup>‡</sup>These authors contributed equally.

## General Methods.

All reagents and solvents were obtained commercially and used as received without further purification. The ligand 5-(3-methyl-5-(pyridin-4-yl)-4*H*-1,2,4-triazol-4-yl)-1,3-benzenedicarboxylic acid (H<sub>2</sub>MPTBDC) was purchased from Shanghai Tensus Bio-tech Co., Ltd. Ultrahigh-purity-grade (>99.999 %) N<sub>2</sub>, C<sub>2</sub>H<sub>2</sub>, and CO<sub>2</sub> gases were purchased from Dalian Special Gases CO., Ltd. Mixed gases C<sub>2</sub>H<sub>2</sub>/CO<sub>2</sub> = 50/50 (mol/mol) was purchased from Huate Gas Co., Ltd.

## Syntheses of JNU-7

A mixture of CoCl<sub>2</sub>·6H<sub>2</sub>O (0.02 mmol, 4.78 mg), H<sub>2</sub>MPTBDC (0.04 mmol, 12.9 mg), methanol (EtOH, 1.5 mL), and N,N-Dimethylacetamide (DMA, 1.5 mL) were placed in a sealed glass vial (10 mL) and heated at 130 °C for 12 h. After it was cooled to room temperature, the light purple crystals (as-synthesized JNU-7) were collected and washed with DMA three times and exchanged with EtOH three times, then heated under high vacuum at 150 °C for 24 h to afford desolvated JNU-7 (JNU-7a, ~ 8 mg, ~ 65 % yield based on H<sub>2</sub>MPTBDC). Anal. calcd. (found) for C<sub>16</sub>H<sub>11</sub>CoN<sub>4</sub>O<sub>4</sub>·5H<sub>2</sub>O: C: 41.03 (40.68%), N: 11.91% (11.86%), H:4.37% (5.49%).

## Single-component gas adsorption

At least 100 mg of sample was used for each measurement. JNU-7 was desolvated at 150 °C under dynamic vacuum (below 5 μmHg) for 24 h. Single-component gas adsorption isotherms were measured on an ASAP 2020 PLUS Analyzer (Micromeritics).

## Powder X-ray diffraction (PXRD) analysis

Powder x-ray diffraction data was collected using microcrystalline samples on a Rigaku Ultima IV diffractometer (40 kV, 40 mA, Cu Kα, λ = 1.5418 Å). The measurement parameters include a scan speed of 10 (°)/min, a step size of 0.02 (°), and a scan range of 2θ from 5 (°) to 30 (°). For temperature-dependent PXRD, the measurement parameters include a scan speed of 10 °C/min, a step size of 0.02 (°),

and a scan range of  $2\theta$  from 5 ( $^{\circ}$ ) to 30 ( $^{\circ}$ ).

### **Thermogravimetric analysis (TGA)**

Thermogravimetric analysis (TGA) was performed on a TA Instruments Q50 instrument. Measurement was made on approximately 5 mg of dried samples under a  $N_2$  flow with a heating rate of 10  $^{\circ}C/min$ .

### **Single-crystal X-ray diffraction analysis**

Single crystal diffraction data of as-synthesized JNU-7 (100 K) and JNU-7a (100 K) were collected *via* an Oxford Cryo stream system on a XtaLAB PRO MM007-DW diffractometer system equipped with a RA-Micro7HF-MR-DW (Cu/Mo) X-ray generator and HyPix-6000HE Hybrid Photon Counting (HPC) X-ray detector (Rigaku, Japan, Cu  $K\alpha$ ,  $\lambda = 1.54178 \text{ \AA}$ ). The structures were solved and refined using Olex 2 with 'XS' and 'XL' plug-ins. For As-synthesized\_JNU-7, a solvent mask was calculated, and 168 electrons were found in a volume of 4308  $\text{A}^3$  in 1 void per unit cell. This is consistent with the presence of 1[H<sub>2</sub>O] per asymmetric unit, which account for 180 electrons per unit cell. For Desolvated\_JNU-7, a solvent mask was calculated and 353 electrons were found in a volume of 9168  $\text{A}^3$  in 1 void per unit cell. This is consistent with the presence of 0.6 EtOH [C<sub>2</sub>H<sub>6</sub>O] and 0.2 DMF [C<sub>3</sub>H<sub>7</sub>NO] per asymmetric unit, which account for 454 electrons per unit cell.

### **The isosteric enthalpy of adsorption ( $Q_{st}$ )**

The isosteric enthalpy of adsorption for C<sub>2</sub>H<sub>2</sub> and CO<sub>2</sub> were calculated using the gas adsorption data collected at 273, 283 and 298 K. The adsorption curves were first fitted with the virial equation:<sup>1</sup>

$$\ln P = \ln N + \frac{1}{T} \sum_{i=0}^m a_i N^i + \sum_{i=0}^n b_i N^i$$

Where  $N$  is gas uptake (in  $\text{mg g}^{-1}$ ),  $P$  is pressure (in mmHg),  $a$  and  $b$  are virial coefficients,  $m$  and  $n$  are the number of coefficients require to adequately describe the isotherm. The parameters that were obtained from the fitting of the C<sub>2</sub>H<sub>2</sub> and CO<sub>2</sub>

adsorption isotherms can be found in **Fig. S11-12** and **Tables S2**. All isotherms were fitted with  $R^2 > 0.999$ .

The obtained parameters were used to calculate  $Q_{st}$  in the range of adsorption capacity through the virial equation, which is as follows:

$$Q_{st} = -R \sum_{i=0}^m a_i N^i$$

### **IAST calculations of adsorption selectivity**

In order to establish the feasibility of  $C_2H_2/CO_2$  separations we performed calculations using the Ideal Adsorbed Solution Theory (IAST) of Myers and Prausnitz.<sup>2</sup>

Let us determine the adsorption selectivity,  $S_{ads}$ , defined for separation of a binary mixture of species  $i$  and  $j$  by

$$S_{ads} = \frac{q_i / q_j}{p_i / p_j}$$

where the  $q_i$  represent the molar loadings of component  $i$  that is in equilibrium with a bulk gas phase with partial pressures  $p_i$  in the mixture.

### **Column Breakthrough Experiments**

The mixed-gas breakthrough separation experiment was conducted under ambient conditions (298 K, 100 kPa) by using a lab-scale fixed-bed system (**Fig. S1**). In a typical breakthrough experiment for  $C_2H_2/CO_2$  (50/50, mol/mol) gas mixture, JNU-7a powder (620 mg) was packed into a stainless steel column (3.15 mm I.D. × 450 mm) with silica wool filling the void space. The sorbent was activated in-situ in the column at 423 K with a high vacuum for 12 h. After the activation process, a helium flow (100 mL min<sup>-1</sup>) was introduced to purge the adsorbent. The flow of helium was then turned off and a gas mixture of  $C_2H_2/CO_2$  (3 mL min<sup>-1</sup>) was allowed to flow into the column. Outlet effluent from the column was continuously monitored

using gas chromatography (GC-7890B, Agilent) with a thermal conductivity detector (TCD). After the breakthrough experiment, the sample was regenerated *in-situ* in the column at room temperature with a high vacuum or helium sweeping for 12 h. The complete breakthrough of C<sub>2</sub>H<sub>2</sub> was indicated by the downstream gas composition reaching that of the feed gas. On the basis of the mass balance, the gas adsorption capacities can be determined as follows:<sup>3</sup>

$$q_i = \frac{C_i V}{22.4 \times m} \times \int_0^t \left(1 - \frac{F}{F_0}\right) dt$$

Where  $q_i$  is the equilibrium adsorption capacity of gas  $i$  (mmol g<sup>-1</sup>),  $C_i$  is the feed gas concentration,  $V$  is the volumetric feed flow rate (mL min<sup>-1</sup>),  $t$  is the adsorption time (min),  $F_0$  and  $F$  are the inlet and outlet gas molar flow rates, respectively, and  $m$  is the mass of the adsorbent (g).

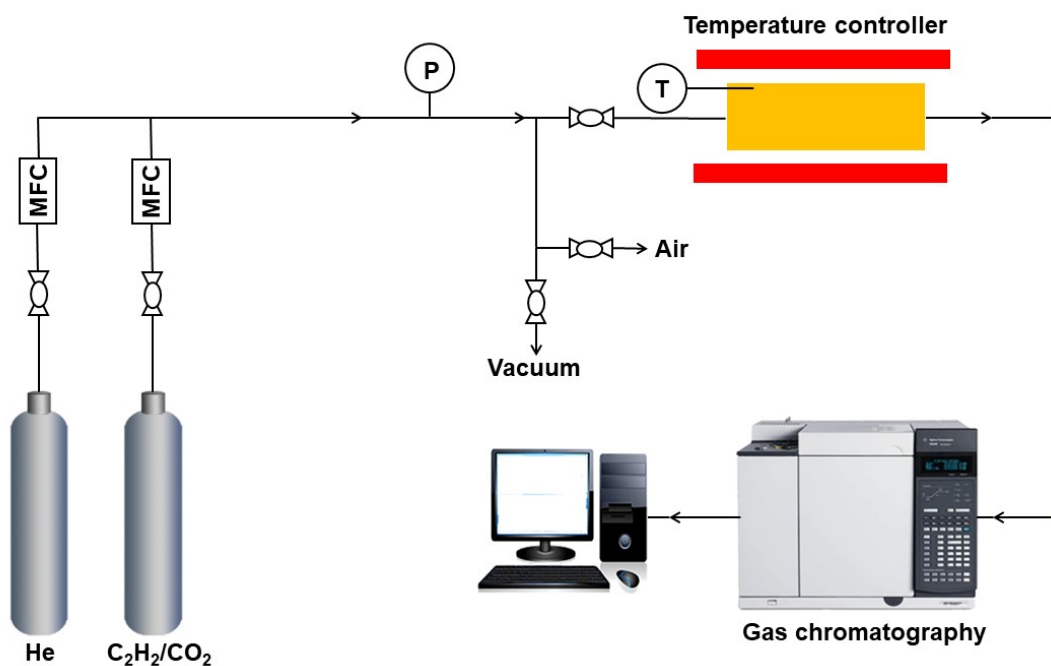

**Fig. S1.** Schematic illustration of the setup for breakthrough experiments.

**Table S1.** Crystal data of as-synthesized JNU-7 and desolvated JNU-7.

|                                                  | <b>as-synthesized</b>                                             | <b>desolvated</b>                                                     |
|--------------------------------------------------|-------------------------------------------------------------------|-----------------------------------------------------------------------|
|                                                  | <b>JNU-7</b>                                                      | <b>JNU-7</b>                                                          |
| <b>Formula</b>                                   | C <sub>22</sub> H <sub>30</sub> CoN <sub>8</sub> O <sub>8.5</sub> | C <sub>18</sub> H <sub>15.4</sub> CoN <sub>4.2</sub> O <sub>4.8</sub> |
| <b>Formula weight</b>                            | 559.44                                                            | 426.27                                                                |
| <b>CCDC number</b>                               | 2205222                                                           | 2205223                                                               |
| <b>Space group</b>                               | R $\bar{3}$                                                       | R $\bar{3}$                                                           |
| <b>Crystal system</b>                            | trigonal                                                          | trigonal                                                              |
| <b>a (Å)</b>                                     | 41.7037(7)                                                        | 41.862(3)                                                             |
| <b>b (Å)</b>                                     | 41.7037(7)                                                        | 41.862(3)                                                             |
| <b>c (Å)</b>                                     | 9.8644(2)                                                         | 9.5888(5)                                                             |
| <b><math>\alpha</math> (deg)</b>                 | 90                                                                | 90                                                                    |
| <b><math>\beta</math> (deg)</b>                  | 90                                                                | 90                                                                    |
| <b><math>\gamma</math> (deg)</b>                 | 120                                                               | 120                                                                   |
| <b>V (Å)<sup>3</sup></b>                         | 14857.7(6)                                                        | 14553(2)                                                              |
| <b>Z</b>                                         | 18                                                                | 18                                                                    |
| <b><math>\rho</math> calcg/cm<sup>3</sup></b>    | 1.125                                                             | 0.876                                                                 |
| <b><math>\mu</math>/mm<sup>-1</sup></b>          | 4.464                                                             | 4.356                                                                 |
| <b>R indexes for</b>                             | R1 = 0.0718                                                       | R1 = 0.0597                                                           |
| <b>I<math>\geq</math>2<math>\sigma</math>(I)</b> | wR2 = 0.1962                                                      | wR2 = 0.1520                                                          |
| <b>R indexes for</b>                             | R1 = 0.0847                                                       | R1 = 0.0924                                                           |
| <b>all data</b>                                  | wR2 = 0.2053                                                      | wR2 = 0.1682                                                          |
| <b>GooF</b>                                      | 1.049                                                             | 0.903                                                                 |
| <b>Completeness</b>                              | 99%                                                               | 96%                                                                   |

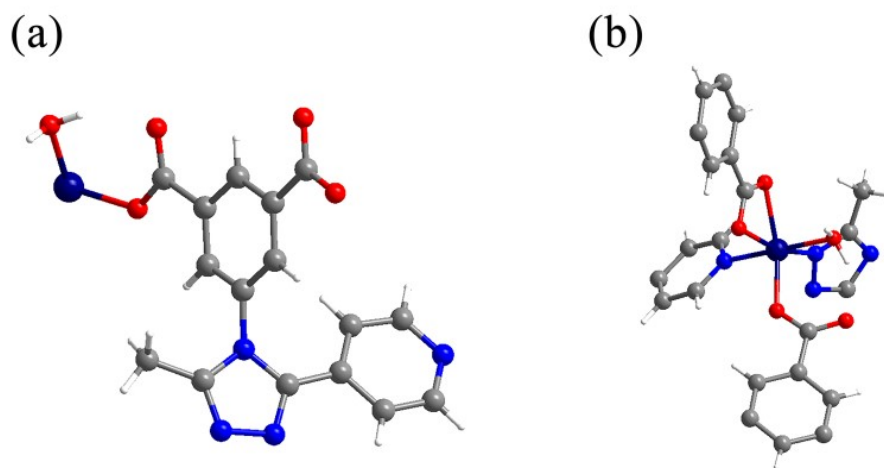

**Fig. S1.** The asymmetric unit (a) and local coordination environments (b) of JNU-7. (Co, light blue; C, dark grey; N, blue; O, red; H, white).

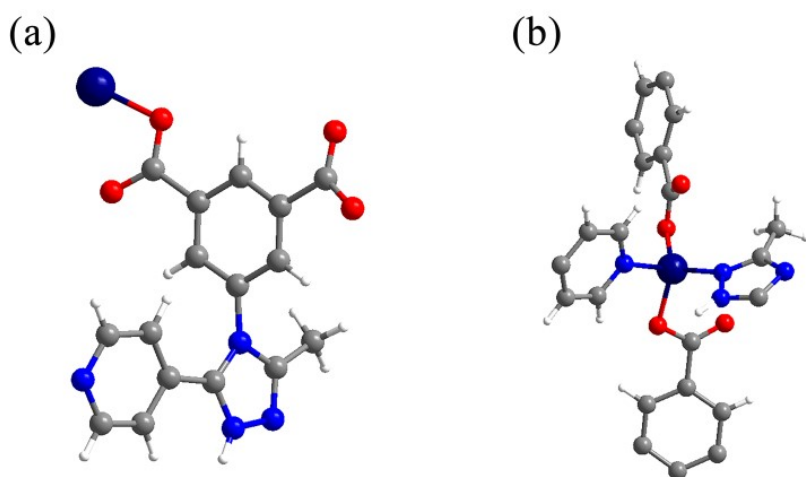

**Fig. S2.** The asymmetric unit (a) and local coordination environments (b) of JNU-7a. (Co, light blue; C, dark grey; N, blue; O, red; H, white).

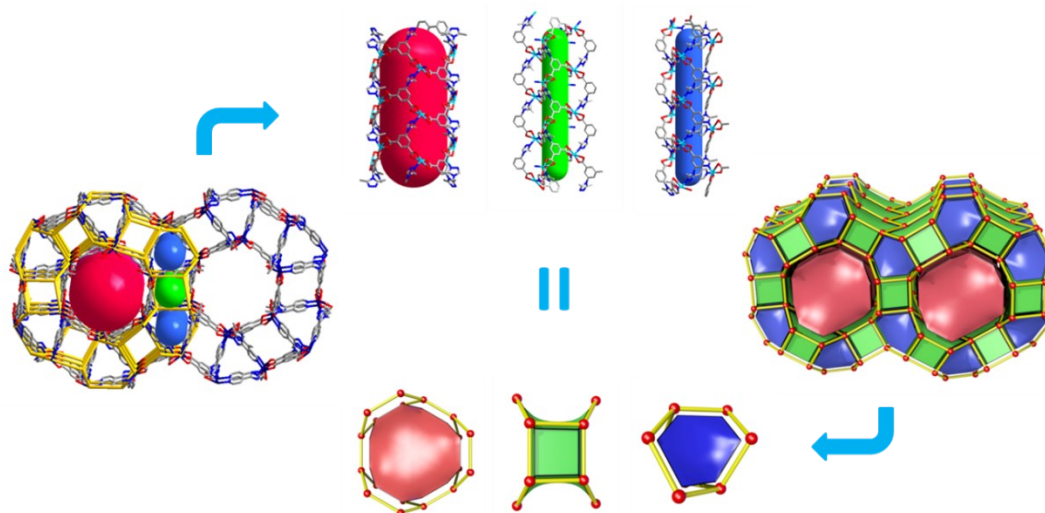

**Fig. S3.** One-dimensional channels in a three-dimensional structure and corresponds to the tiles in a topological structure.

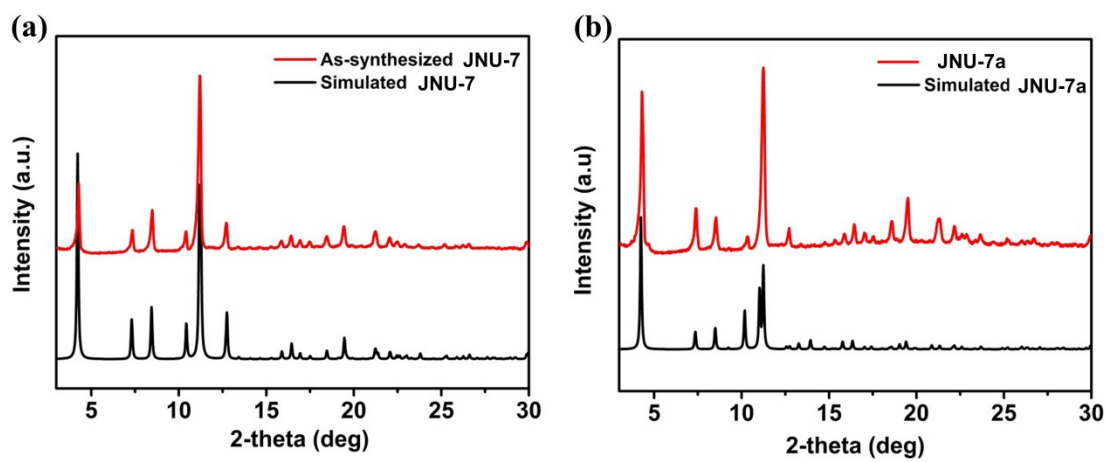

**Fig. S4.** PXR D patterns of JNU-7 (a) and JNU-7a (b), simulated (black) and as-synthesized (red).



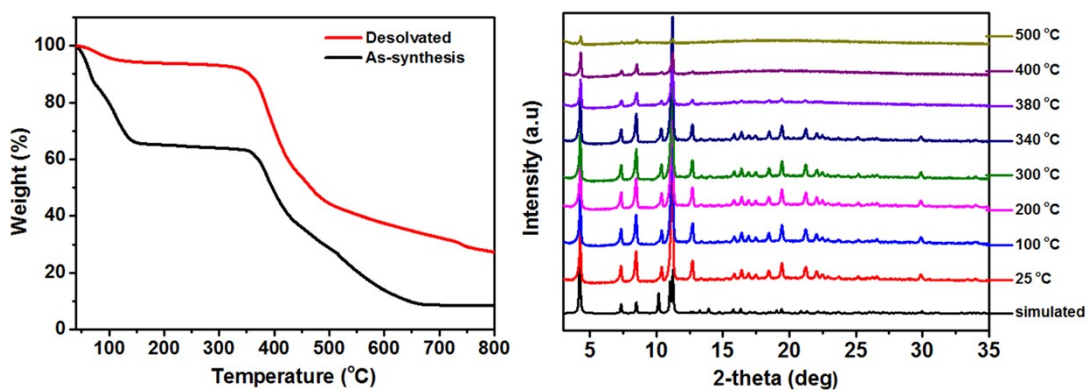

**Fig. S5.** (a) Thermogravimetric analysis (TGA) curve of the JNU-7 (black) and JNU-7a (red). (b) *In-situ* variable-temperature PXRD (VT-PXRD) patterns of JNU-7a under a N<sub>2</sub> atmosphere.

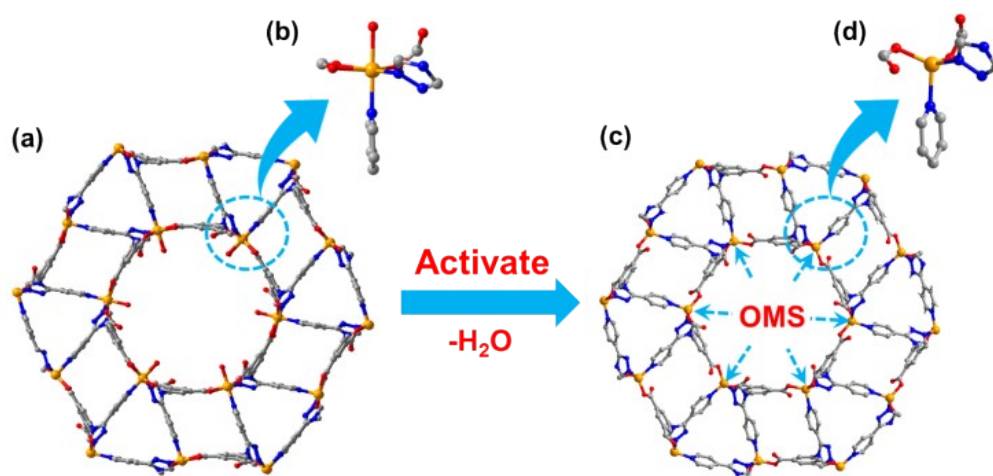

**Fig. S6.** Analysis of the structural transformation and the formation of open metal sites. The crystal structure of JNU-7 (a) and its metal coordination environment (b) seen in the c direction. The crystal structure of JNU-7a (c) and its metal coordination environment (d) seen in the c direction.

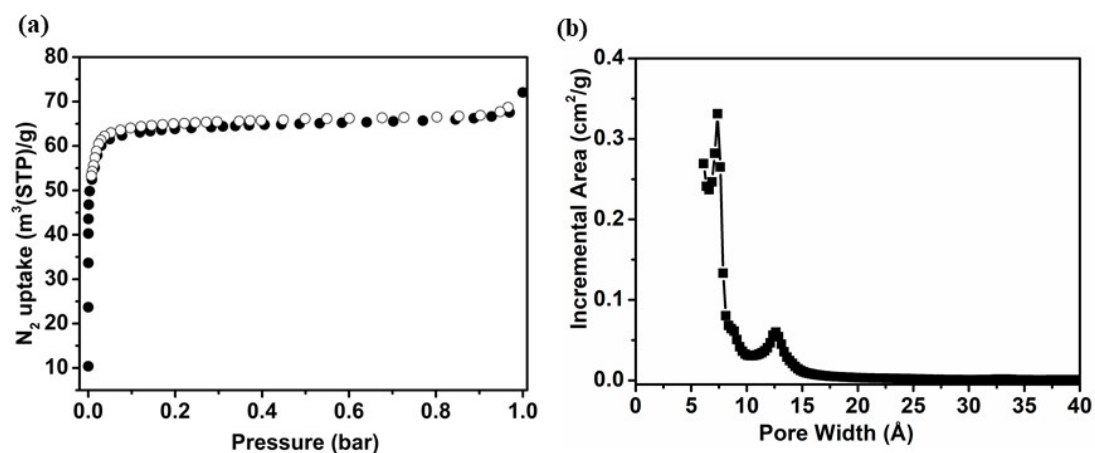

**Fig. S7.** (a)  $N_2$  adsorption/desorption isotherms of JNU-7 (activated at RT) at 77 K. (b) calculated pore-size distribution based on the adsorption branch, the solid ball is adsorption and the hollow ball is desorption.

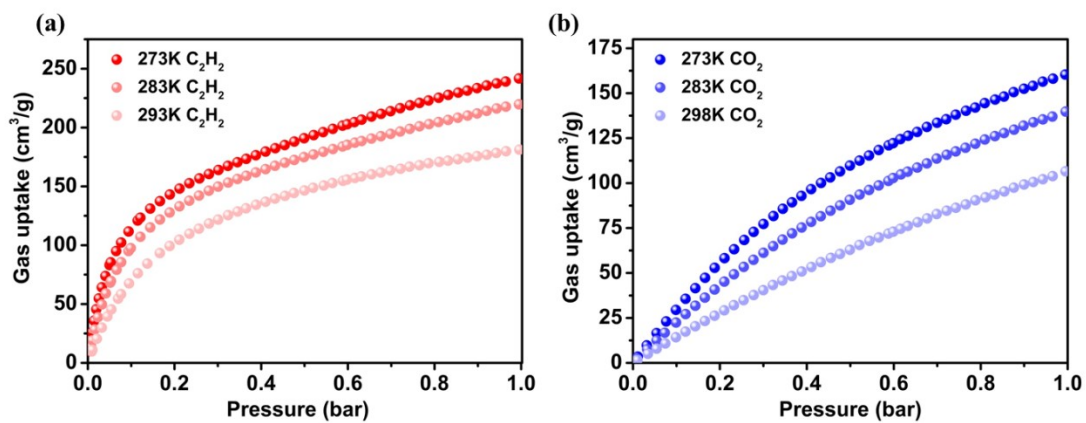

**Fig. S8.**  $C_2H_2$  and  $CO_2$  adsorption isotherms of JNU-7a at different temperatures.

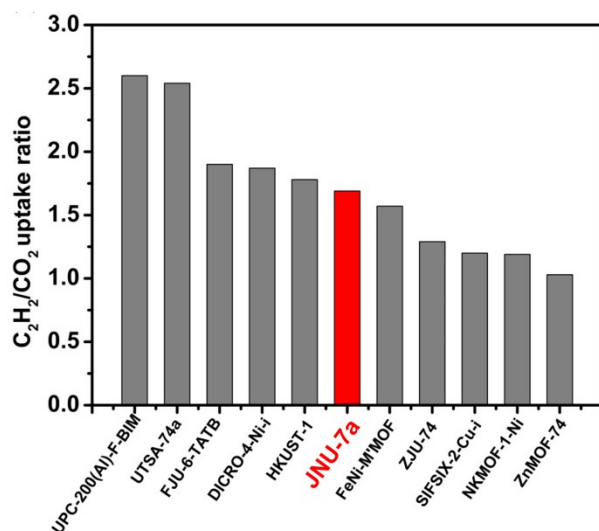

**Fig. S9.** Comparison of C<sub>2</sub>H<sub>2</sub>/CO<sub>2</sub> uptake ratio among representative MOFs for C<sub>2</sub>H<sub>2</sub>/CO<sub>2</sub> separation.

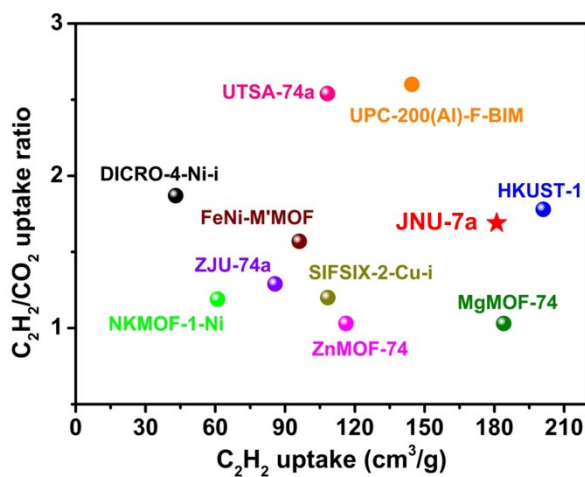

**Fig. S10.** C<sub>2</sub>H<sub>2</sub>/CO<sub>2</sub> uptake ratio as a function of C<sub>2</sub>H<sub>2</sub> uptakes for JNU-7a and other select separating C<sub>2</sub>H<sub>2</sub> MOFs.

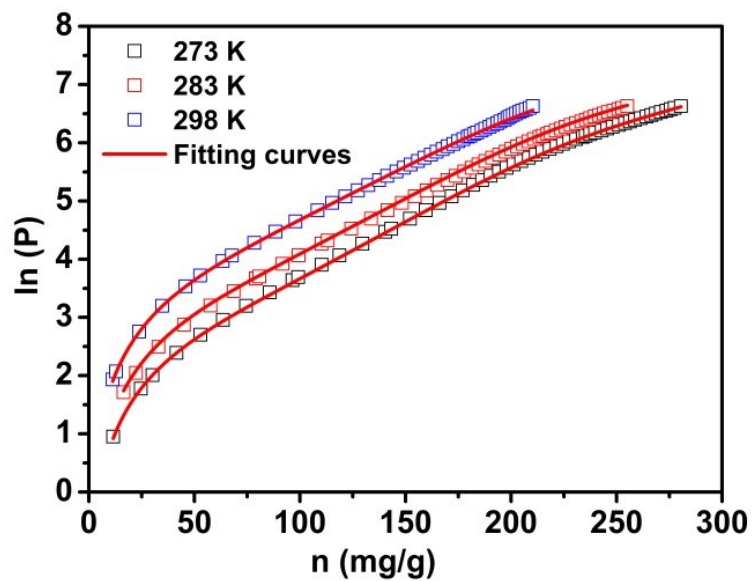

**Fig. S11.** Virial equation fitting of the  $C_2H_2$  adsorption isotherm of JNU-7a at 273, 283 and 298 K.

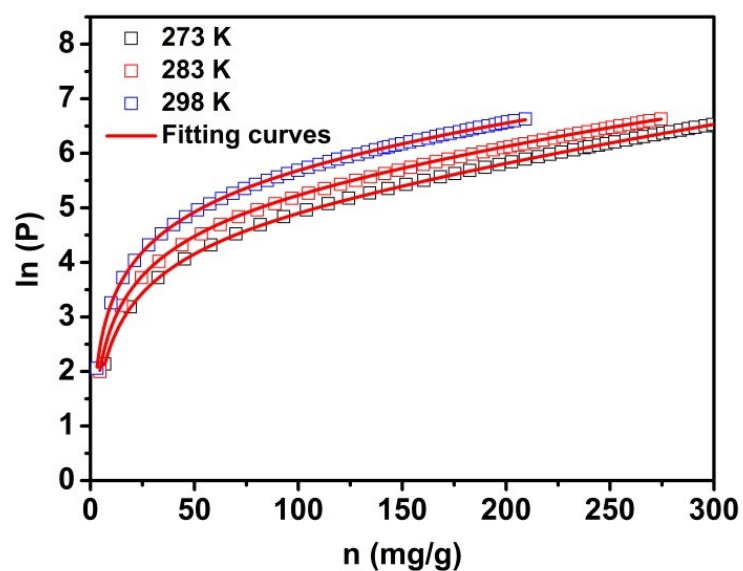

**Fig. S12.** Virial equation fitting of the  $CO_2$  adsorption isotherm of JNU-7a at 273, 283 and 298 K.

**Table S2.** Isothermic heats of adsorption of C<sub>2</sub>H<sub>2</sub> and CO<sub>2</sub> fitting parameters for JNU-7a.

| <b>Parameter</b>     | <b>C<sub>2</sub>H<sub>2</sub></b> | <b>CO<sub>2</sub></b> |
|----------------------|-----------------------------------|-----------------------|
| <b>a<sub>0</sub></b> | -3255.57667                       | -2374.14711           |
| <b>a<sub>1</sub></b> | -1.40753                          | -3.17967              |
| <b>a<sub>2</sub></b> | -0.0195                           | 0.00976               |
| <b>a<sub>3</sub></b> | 4.51322E-4                        | 5.2737E-5             |
| <b>a<sub>4</sub></b> | -1.69532E-6                       | -1.64708E-7           |
| <b>a<sub>5</sub></b> | 2.10301E-9                        | 1.80325E-10           |
| <b>R<sup>2</sup></b> | 0.999                             | 0.999                 |

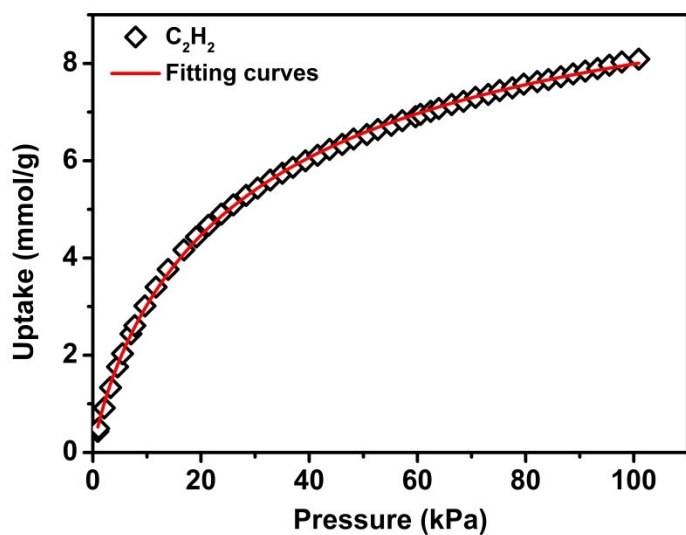

**Fig. S13.** Single-site Langmuir-Freundlich fitting of the  $C_2H_2$  adsorption isotherm of JNU-7a at 298 K.

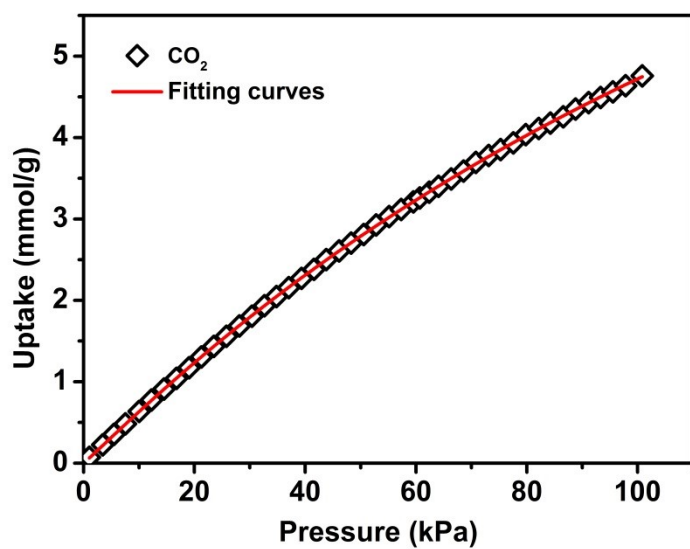

**Fig. S14.** Single-site Langmuir-Freundlich fitting of the  $CO_2$  adsorption isotherm of JNU-7a at 298 K.

## Theoretical Calculations

To better study the adsorption and separation mechanism, Grand Canonical Monte Carlo (GCMC) simulations were performed by RASPA2 software<sup>4,5</sup>. The single-component adsorption isotherms of C<sub>2</sub>H<sub>2</sub> and CO<sub>2</sub> on JNU-7a were simulated at 298 K and pressure up to 1 bar. The Lennard-Jones (LJ) parameters of JNU-7a were taken from the universal force field (UFF),<sup>6</sup> whereas C<sub>2</sub>H<sub>2</sub> and CO<sub>2</sub> molecules were obtained from literatures.<sup>7,8</sup> The LJ parameters of different atom types were computed using the Lorentz-Berthelot mixing rules. The cut-off radius was chosen as 14 Å for the LJ potential, and the long-range electrostatic interactions were handled using Ewald summation technique. The equilibration steps and production steps were both set as  $1.0 \times 10^7$ . The DDEC charges<sup>9</sup> of the framework atoms were calculated by the Vienna ab initio simulation package (VASP)<sup>10,11</sup>. Perdew-Burke-Ernzerhof (PBE) functional with generalized gradient approximation (GGA) was used to evaluate the electron exchange correlation.

To better explain the host-guest interactions between JNU-7a and gas molecules, the dispersion-corrected density functional theory (DFT-D) calculations were performed using Gaussian 16 software.<sup>12</sup> The cluster models were extracted from the JNU-7a framework, and the truncated bonds were saturated by hydrogen atoms or methyl groups. All geometry optimizations were performed at the B3LYP-D3(BJ)/6-31G\* level for the non-metal atoms.<sup>13-15</sup> For Co atom, the LanL2DZ basis set<sup>16</sup> was used to take into account the relativistic effects. Frequency analyses were performed at the same computational level to confirm local minima for each optimized structure. Based on the optimized geometries, these binding energies ( $\Delta E$ ) were corrected from the basis set superposition error (BSSE) by the counterpoise procedure.<sup>17</sup> The binding energy ( $\Delta E$ ) of gas molecules adsorbed in JNU-7a was calculated with the following equation:

$$\Delta E = E_{gas@JNU-7a} - E_{JNU-7a} - E_{gas} + E_{BSSE}$$

Where  $E_{gas@JNU-7a}$ ,  $E_{JNU-7a}$ ,  $E_{gas}$  are the optimization energy of JNU-7a with an adsorbed gas molecule, JNU-7a structure and isolated gas molecule, respectively.

while the  $E_{BSSE}$  can correct for weak intermolecular interactions.

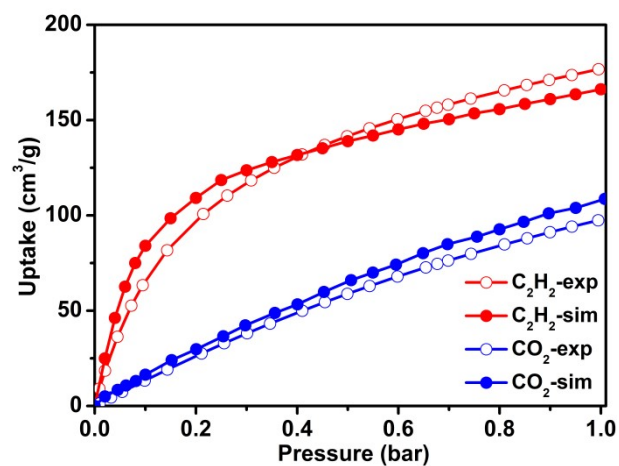

**Fig. S15.** Experimental and simulated adsorption isotherms of  $C_2H_2$  (red) and  $CO_2$  (blue) at 298 K and up to 1 bar.

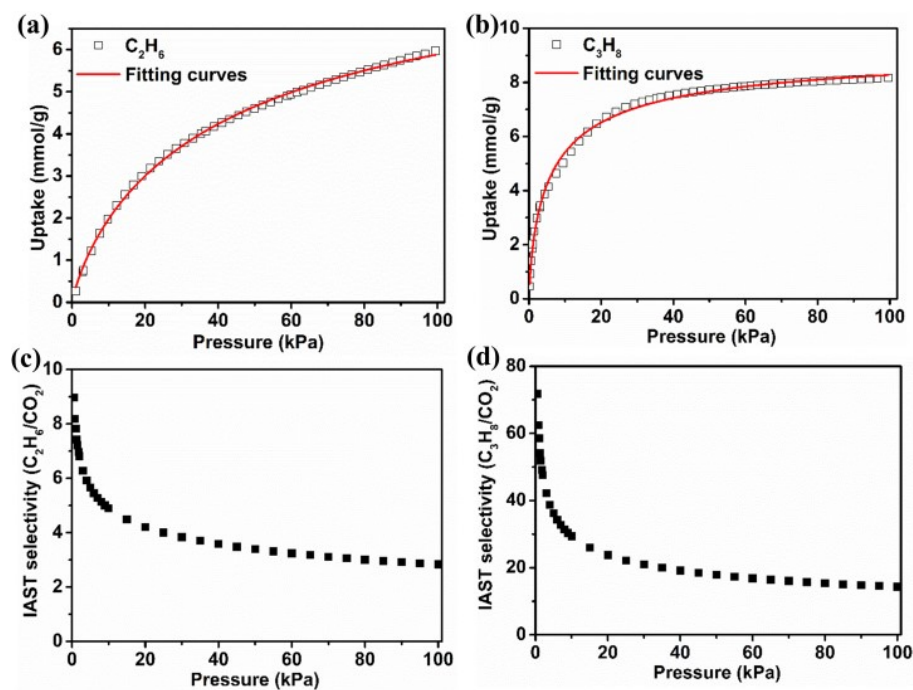

**Fig. S16.** Single-site Langmuir-Freundlich fitting of the (a)  $C_2H_6$  and (b)  $C_3H_8$  adsorption isotherm of JNU-7a at 298 K. (c) IAST selectivity of JNU-7a for  $C_2H_6/CO_2$  (v/v, 50:50) mixture. (d) IAST selectivity of JNU-7a for  $C_3H_8/CO_2$  (v/v, 50:50) mixture.



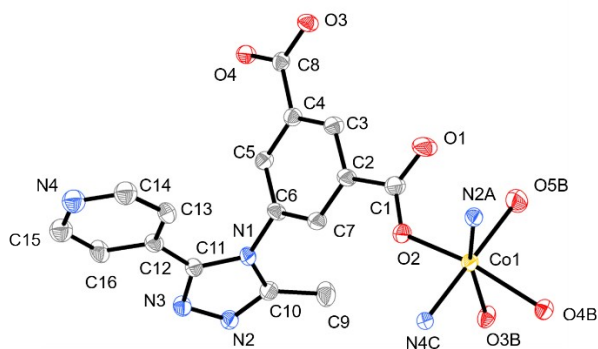

**Fig. S17.** ORTEP diagram of As-synthesized\_JNU-7 at 100 K with 50% thermal ellipsoid probability. Solvent molecules and hydrogen atoms are omitted for clarity. Symmetry operation: A ( $x, y, 1+z$ ); B ( $2/3+x-y, 1/3+x, 4/3-z$ ); C ( $1/3-x+y, 2/3-x, 2/3+z$ ).

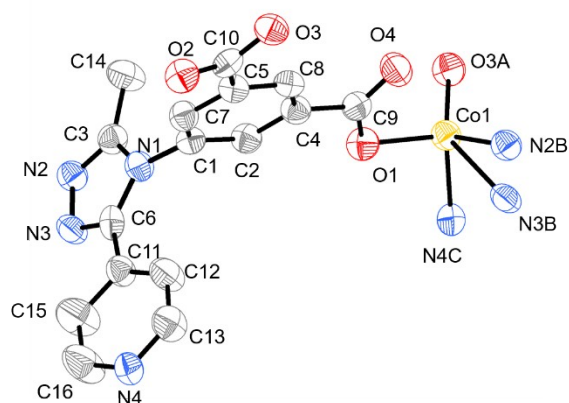

**Fig. S18.** ORTEP diagram of Desolvated\_JNU-7 at 100 K with 50% thermal ellipsoid probability. Solvent molecules and hydrogen atoms are omitted for clarity. Symmetry operation: A ( $1/3+y, 2/3-x+y, 2/3-z$ ); B ( $x, y, -1+z$ ); C ( $2/3-y, 1/3+x-y, -2/3+z$ ).

**Table S3.** Langmuir-Freundlich parameters from the fitting of C<sub>2</sub>H<sub>2</sub> and CO<sub>2</sub> adsorption isotherms of JNU-7a at 298 K. The R<sup>2</sup> values are also provided.

| <b>Parameter</b>   | C <sub>2</sub> H <sub>2</sub> | CO <sub>2</sub> |
|--------------------|-------------------------------|-----------------|
| q <sub>A,sat</sub> | 10.92482                      | 14.00029        |
| b <sub>A</sub>     | 0.05419                       | 0.00439         |
| n <sub>A</sub>     | 0.85041                       | 1.03206         |
| R <sup>2</sup>     | 0.999                         | 0.9999          |

**Table S4.** Comparison of the C<sub>2</sub>H<sub>2</sub> adsorption uptake, C<sub>2</sub>H<sub>2</sub>/CO<sub>2</sub> selectivity, and heat of adsorption data in JNU-7a with some top-performing C<sub>2</sub>H<sub>2</sub>-selective materials reported.

| Materials         | S <sub>A</sub> BET<br>(m <sup>2</sup> /g) | Gas uptake<br>(298 K)         |                 | C <sub>2</sub> H <sub>2</sub> /CO <sub>2</sub> | Q <sub>st</sub> of<br>C <sub>2</sub> H <sub>2</sub><br>(kJ/mol) | IAST      | Ref.      |
|-------------------|-------------------------------------------|-------------------------------|-----------------|------------------------------------------------|-----------------------------------------------------------------|-----------|-----------|
|                   |                                           | C <sub>2</sub> H <sub>2</sub> | CO <sub>2</sub> |                                                |                                                                 |           |           |
| JNU-7a            | 2046                                      | 176                           | 97              | 1.8                                            | 27                                                              | 12-5      | This work |
| NKMOF-1-Ni        | 380                                       | 61                            | 51.1            | 1.19                                           | 58.0                                                            | 249.3-30  | 18        |
| UTSA-74a          | 830                                       | 108.2                         | 70.9            | 2.54                                           | 32                                                              | 20-9      | 19        |
| CoMOF-74          | 1056                                      | 197                           | -               | -                                              | 50.1                                                            | -         | 20        |
| MgMOF-74          | 1495                                      | 184                           | 179             | 1.03                                           | 34                                                              | 1.03      | 21        |
| HKUST-1           | 1401                                      | 201                           | 113             | 1.78                                           | 39                                                              | 11        | 22        |
| DICRO-4-Ni-i      | 398                                       | 43                            | 23              | 1.87                                           | 37.7                                                            | 18.2-13.9 | 23        |
| HOF-3a            | 165                                       | 47                            | 21              | 2.24                                           | 19                                                              | 14        | 24        |
| UTSA-300a         | 311                                       | 68.9                          | 3.3             | 20.9                                           | 57.6                                                            | 0.02-743  | 25        |
| FeNi-M'MOF        | 383                                       | 96.1                          | 60.9            | 1.57                                           | 27-32.8                                                         | 24        | 26        |
| UPC-200(Al)-F-BIM | -                                         | 144.5                         | 55.5            | 2.6                                            | 18.9-20.5                                                       | 3.1       | 27        |
| FJU-6-TATB        | 1306                                      | 110                           | 58              | 1.9                                            | -                                                               | 5.3-3.1   | 28        |
| JNU-1             | 818                                       | 64                            | -               | 6.68                                           | 13-47.6                                                         | 285.6-6.6 | 29        |
| ZJU-74            | 694                                       | 85.7                          | 66.3            | 1.29                                           | 45-65                                                           | 170-36.5  | 30        |
| ATC-Cu            | 600                                       | 112.2                         | 90.0<br>5       | 1.25                                           | 79.1                                                            | 53.6      | 31        |

**Table S5.** Contributions of open metal sites (OMSs) and pore space in acetylene uptakes for selected MOFs at room temperature and 100 kPa for volumetric capacity in the unit of  $\text{cm}^3$  (STP)  $\text{cm}^3$ .

| Materials    | Framework<br>Density<br>( $\text{g}/\text{cm}^3$ ) | OMS<br>density<br>( $\text{mmol}/\text{cm}^3$ ) | $\text{C}_2\text{H}_2$ uptake ( $\text{cm}^3/\text{cm}^3$ ) |                     |            | Ref.      |
|--------------|----------------------------------------------------|-------------------------------------------------|-------------------------------------------------------------|---------------------|------------|-----------|
|              |                                                    |                                                 | By<br>OMS                                                   | By<br>pore<br>space | Sum        |           |
| <b>JNU-7</b> | <b>0.785</b>                                       | <b>2.05</b>                                     | <b>46</b>                                                   | <b>112</b>          | <b>158</b> | This work |
| HKUST-1      | 0.879                                              | 4.36                                            | 97                                                          | 80                  | 177        | 22        |
| CoMOF-74     | 1.169                                              | 7.49                                            | 168                                                         | 62                  | 230        | 20        |
| MgMOF-74     | 0.909                                              | 7.49                                            | 199                                                         | -                   | 184        | 21        |
| ZJU-5        | 0.598                                              | 2.31                                            | 52                                                          | 63                  | 115        | 32        |
| NOTT-101     | 0.684                                              | 2.35                                            | 53                                                          | 73                  | 126        | 33        |
| FJI-H8       | 0.873                                              | 3.13                                            | 70                                                          | 126                 | 196        | 34        |
| UTSA-74a     | 1.342                                              | 8.3                                             | 186                                                         | -                   | 145        | 19        |
| FeNiM'MOF    | 1.375                                              | 9.2                                             | 206                                                         | -                   | 133        | 26        |
| ZJU-74       | 1.353                                              | 9.1                                             | 204                                                         | -                   | 116        | 30        |

**Table S6.** Breakthrough calculations for separation of 50/50 C<sub>2</sub>H<sub>2</sub>/CO<sub>2</sub> mixture at 298 K.

|          | <b>C<sub>2</sub>H<sub>2</sub> adsorbed during 0-<math>\tau_{\text{break}}</math></b> | <b>Ref.</b> |
|----------|--------------------------------------------------------------------------------------|-------------|
|          | <b>mol L<sup>-1</sup></b>                                                            |             |
| JNU-7a   | 4.44                                                                                 | This work   |
| UTSA-74a | 4.86                                                                                 | 19          |
| PCP-33   | 4.16                                                                                 | 35          |
| HOF-3    | 0.7                                                                                  | 36          |

## Reference

1. M. Dinca, A. Dailly, Y. Liu, C. M. Brown, D. A. Neumann and J. R. Long, *J. Am. Chem. Soc.*, 2006, **128**, 16876-16883.
2. A. L. Myers and J. M. Prausnitz, *AIChE J.*, 1965, **11**, 121-127.
3. J. Liu, J. Tian, P. K. Thallapally and B. P. McGrail, *The Journal of Physical Chemistry C*, 2012, **116**, 9575-9581.
4. D. Dubbeldam, A. Torres-Knoop, K. S. Walton, *Mol. Simul.* 2013, **39**, 1253–1292.
5. D. Dubbeldam, S. Calero, D. E. Ellis, R. Q. Snurr, *Nanoporous Materials. Mol. Simul.* 2016, **42**, 81–101.
6. A. K. Rappé, C. J. Casewit, K. S. Colwell, W. A. Goddard, W. M. Skiff, *J. Am. Chem. Soc.* 1992, **114**, 10024–10035.
7. W. L. Jorgensen, J. D. Madura, C. J. Swenson, *J. Am. Chem. Soc.* 1984, **106**, 6638–6646.
8. A. Garcia-Sanchez, C. O. Ania, J. B. Parra, D. Dubbeldam, T. J. H. Vlugt, R. Krishna, Calero, *S. J. Phys. Chem. C* 2009, **113**, 8814–8820.
9. T. A. Manz, D. S. Sholl, *J. Chem. Theory Comput.* 2010, **6**, 2455–2468.
10. G. Kresse, J. Furthmuller, *Phys. Rev. B: Condens. Matter Mater. Phys.* 1996, **54**, 11169–11186.
11. G. Kresse, D. Joubert, *Phys. Rev. B: Condens. Matter Mater. Phys.* 1999, **59**, 1758–1775.
12. M. J. Frisch, G. W. Trucks, H. B. Schlegel, G. E. Scuseria, M. A. Robb, J. R. Cheeseman, G. Scalmani, V. Barone, G. A. Petersson, H. Nakatsuji, Gaussian 16, revision B.01; Gaussian, Inc.: Wallingford, CT, 2016. **66**.
13. A. D. Becke, *J. Chem. Phys.* 1992, **96**, 2155–2160.
14. S. Grimme, J. Antony, S. Ehrlich, H. Krieg, *J. Chem. Phys.* 2010, **132**, 154104
15. P. C. Hariharan, J. A. Pople, *Theoretica Chimica Acta* 1973, **28**, 213–222.
16. L. E. Roy, P. J. Hay, R. L. Martin, *J. Chem. Theory Comput.* 2008, **4**, 1029–1031.
17. S. F. Boys, F. Bernardi, *Mol. Phys.* 1970, **19**, 553–566.

18. Y. L. Peng, T. Pham, P. Li, T. Wang, Y. Chen, K. J. Chen, K. A. Forrest, B. Space, P. Cheng, M. J. Zaworotko and Z. Zhang, *Angew. Chem. Int. Ed.*, 2018, **57**, 10971–10975.
19. F. Luo, C. Yan, L. Dang, R. Krishna, W. Zhou, H. Wu, X. Dong, Y. Han, T. L. Hu, M. O'Keeffe, L. Wang, M. Luo, R. B. Lin and B. Chen, *J. Am. Chem. Soc.*, 2016, **138**, 5678–5684.
20. S. Xiang, W. Zhou, Z. Zhang, M. A. Green, Y. Liu and B. Chen, *Angew. Chem. Int. Ed.*, 2010, **122**, 4719–4722.
21. E. D. Bloch, W. L. Queen, R. Krishna, J. M. Zadrozny, C. M. Brown and J. R. Long, *Science*, 2012, **335**, 1606–1610.
22. Y. He, R. Krishna and B. Chen, *Energy Environ. Sci.*, 2012, **5**, 9107–9120.
23. H. S. Scott, M. Shivanna, A. Bajpai, D. G. Madden, K.-J. Chen, T. Pham, K. A. Forrest, A. Hogan, B. Space and J. J. Perry IV, *ACS Appl. Mater. Inter.*, 2017, **9**, 33395–33400.
24. P. Li, Y. He, Y. Zhao, L. Weng, H. Wang, R. Krishna, H. Wu, W. Zhou, M. O'Keeffe, Y. Han and B. Chen, *Angew. Chem. Int. Ed.*, 2015, **54**, 574–577.
25. R. B. Lin, L. Li, H. Wu, H. Arman, B. Li, R. G. Lin, W. Zhou and B. Chen, *J. Am. Chem. Soc.*, 2017, **139**, 8022–8028.
26. J. Gao, X. Qian, R. B. Lin, R. Krishna, H. Wu, W. Zhou and B. Chen, *Angew. Chem. Int. Ed.*, 2020, **59**, 4396–4400.
27. W. Fan, S. Yuan, W. Wang, L. Feng, X. Liu, X. Zhang, X. Wang, Z. Kang, F. Dai, D. Yuan, D. Sun and H. C. Zhou, *J. Am. Chem. Soc.*, 2020, **142**, 8728–8737.
28. L. Liu, Z. Yao, Y. Ye, Y. Yang, Q. Lin, Z. Zhang, M. O'Keeffe and S. Xiang, *J. Am. Chem. Soc.*, 2020, **142**, 9258–9266.
29. H. Zeng, M. Xie, Y. L. Huang, Y. Zhao, X. J. Xie, J. P. Bai, M. Y. Wan, R. Krishna, W. Lu and D. Li, *Angew. Chem. Int. Ed.*, 2019, **58**, 8515–8519.
30. J. Pei, K. Shao, J. X. Wang, H. M. Wen, Y. Yang, Y. Cui, R. Krishna, B. Li and G. Qian, *Adv. Mater.*, 2020, **32**, e1908275.
31. Z. Niu, X. Cui, T. Pham, G. Verma, P. C. Lan, C. Shan, H. Xing, K. A. Forrest, S. Suepaul, B. Space, A. Nafady, A. M. Al-Enizi and S. Ma, *Angew. Chem. Int. Ed.*,

2021, **60**, 5283–5288.

32. X. Rao, J. Cai, J. Yu, Y. He, C. Wu, W. Zhou, T. Yildirim, B. Chen and G. Qian, *Chem. Commun.*, 2013, **49**, 6719–6721.

33. Y. He, R. Krishna and B. Chen, *Energy Environ. Sci.*, 2012, **5**, 9107–9120.

34. J. Pang, F. Jiang, M. Wu, C. Liu, K. Su, W. Lu, D. Yuan and M. Hong, *Nat. Commun.*, 2015, **6**, 7575.

35. J. Duan, W. Jin and R. Krishna, *Inorg. Chem.*, 2015, **54**, 4279–4284.

36. H. S. Scott, M. Shivanna, A. Bajpai, D. G. Madden, K. J. Chen, T. Pham, K. A. Forrest, A. Hogan, B. Space, J. J. Perry Iv and M. J. Zaworotko, *ACS Appl. Mater. Inter.*, 2017, **9**, 33395–33400.
